# Optimización del cálculo de la Vía de Intenso Desagüe con criterios hidráulicos

## *Optimization of the Floodplain Encroachment calculation with hydraulic criteria*

Sanz-Ramos, M. <sup>a1</sup>, Bladé, E. <sup>a2</sup>, Escolano, E. <sup>a3</sup>

<sup>a1</sup>Institut FLUMEN (UPC-CIMNE), E.T.S. d'Enginyeria de Camins, Canal i Ports de Barcelona, Universitat Politècnica de Catalunya – Barcelona TECH, C/Gran Capitán S/N, 08034 Barcelona, España.

E-mail: <sup>a1</sup>marcos.sanz-ramos@upc.edu, <sup>a2</sup>ernest.blade@upc.edu, <sup>a3</sup>escolano@cimne.upc.edu

Recibido: 31/03/2020

Aceptado: 02/06/2020

Publicado: 31/07/2020

**Citar como:** Sanz-Ramos, M., Bladé, E., Escolano, E. 2020. Optimization of the Floodplain Encroachment calculation with hydraulic criteria. *Ingeniería del agua*, 24(3), 203-218. <https://doi.org/10.4995/ia.2020.13364>

---

## RESUMEN

La legislación española actual exige que en los estudios de inundabilidad se delimite la Zona de Flujo Preferente (ZFP), compuesta por envolvente de la Zona de Inundación Peligrosa (ZIP) y la Vía de Intenso Desagüe (VID). La delimitación de la VID es compleja, subjetiva, y no tiene solución única. Habitualmente se determina mediante la restricción de la zona disponible para el flujo, estrechando la zona que ocupa la avenida de 100 años de periodo de retorno, es decir, no permitiendo el flujo en las zonas más alejadas del eje del río. En el presente trabajo se analiza el concepto de VID, y se muestra cómo, en algunos casos, el método anterior no es el mejor, en especial en presencia de zonas de flujo desconectadas o en casos en los que el flujo puede tener una componente transversal importante. Finalmente, se presenta una metodología para la definición de una VID con el mayor sentido físico posible, mediante modelización numérica bidimensional.

**Palabras clave** | Inundaciones fluviales; riesgo de inundación; zona de flujo preferente; vía de intenso desagüe; Iber.

---

## ABSTRACT

*The current Spanish legislation requires flood risk assessment studies to determine the Preferential Flow Zone (ZFP), which consists of the union of the Hazardous Flood Area (ZIP) and the Intense Flow Path (VID). The definition of the VID is complex, subjective, and has no unique solution. It is usually determined by subsequently restricting the area available for flow, narrowing the area that initially occupies the flood of a 100-year return period, and controlling the increase in water depth this floodplain restriction causes. In this work the concept of VID is analysed, and it is shown how, in some cases, the common previous method is not the best, especially in the presence of disconnected flow zones or in cases where the flow may have an important transverse component. Finally, a methodological proposal is presented for the definition of a VID with physical sense, using two-dimensional numerical modelling.*

**Key words** | fluvial floods; flood risk; preferential flow zone; floodplain encroachment; Iber.

## INTRODUCCIÓN

Las inundaciones son uno de los fenómenos naturales que más daños producen en el mundo (Fonseca et al., 2018; ISDR, 2009; Kron, 2005). En los últimos 20 años han supuesto pérdidas económicas superiores a 600 millones de dólares y han afectado a más de 2000 millones de personas (UNISDR, 2015). La implementación de la Directiva Europea sobre el Riesgo de inundación (DOUE-L-2007-82010, 2007) pretende paliar esta situación obligando a los estados miembros de la Unión Europea a i) identificar y seleccionar áreas de riesgo potencial significativo de inundación, ii) a elaborar mapas con información de peligrosidad y riesgo de inundación y iii) a redactar los Planes de Gestión del Riesgo de Inundación (PGRI). La trasposición de esta normativa a la regulación española, publicadas en el Boletín Oficial del Estado (BOE), se realizó mediante el Real Decreto 9/2008 (BOE-A-2008-755, 2008), en adelante RD, y el RD 903/2010 (BOE-A-2010-11184, 2010), a las que hay que sumar el ya existente RD 849/1986 y las modificaciones que se han realizado al respecto con el RD 9/2008 (BOE-A-2008-755, 2008) y el RD 638/2016 (BOE-A-2016-12466, 2016).

Los PGRI son instrumentos informativos, operativos y legales orientados a la reducción y gestión del riesgo de inundación. Para su redacción es necesario definir la zona inundable, en cada uno de los ámbitos, en función de la probabilidad de ocurrencia del evento (periodo de retorno, T), así como las afecciones potenciales para posteriormente realizar la planificación del espacio fluvial. En base a la legislación antes mencionada, para la caracterización del espacio fluvial (Figura 1), y por ende del riesgo de inundación, es obligatorio determinar la Zona de Flujo Preferente (ZFP), que se define como la envolvente de la Vía de Intenso Desagüe (VID) y la Zona de Inundación Peligrosa (ZIP) para un periodo de retorno de 100 años ( $T = 100$ ), y que tiene connotaciones legales para con los usos del suelo (BOE-A-2016-12466, 2016).

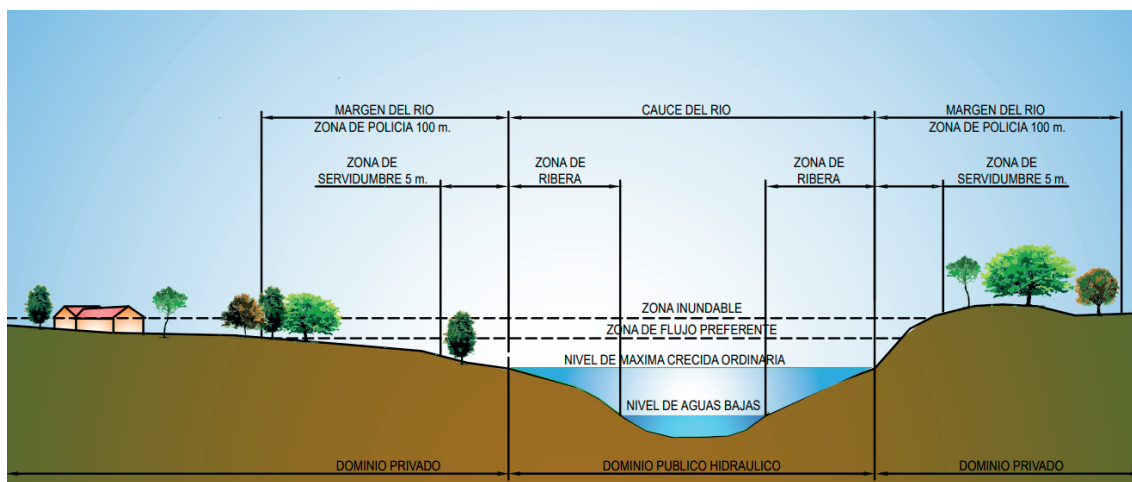

**Figura 1** | Zonificación de la zona inundable (fuente: Ministerio para la Transición Ecológica, MITECO).

La definición de la ZIP es clara y concisa (RD 849/1986, artículo 9, definida como Zona de Daños Graves), y lo más importante, es función de variables hidráulicas, por lo que es cuantificable. La descripción de la VID en la normativa es, a priori, conceptualmente clara, siendo aquella zona por la que se concentra preferentemente el flujo. Sin embargo, esta definición no es suficientemente concisa para su determinación, por lo que se tuvo que incorporar un añadido: «[...] zona por la que pasaría la avenida de 100 años de periodo de retorno sin producir una sobre elevación mayor que 0.3 m, respecto a la cota de la lámina de agua que se produciría con esa misma avenida considerando toda la llanura de inundación existente. La sobre elevación anterior podrá, a criterio del organismo de cuenca, reducirse hasta 0.1 m cuando el incremento de la inundación pueda producir graves perjuicios o aumentarse hasta 0.5 m en zonas rurales o cuando el incremento de la inundación produzca daños reducidos [...]». Sin embargo, este añadido no hace referencia a una metodología para su obtención. Es más, a diferencia de la ZIP, con esta descripción de la VID, a la hora de determinarla, no existe una única solución. En general, para alcanzar una VID que cumpla con los requerimientos (un valor de sobre elevación) se requiere de un proceso iterativo y, con ello, se llega a una de las infinitas soluciones posibles.

Con el fin de limitar ambigüedades y facilitar el proceso de obtención de la VID, se han analizado diferentes criterios para su obtención basados en variables hidráulicas. Este análisis se desarrolla en base a técnicas de simulación numérica ya que permiten cuantificar, con un alto grado de fiabilidad, variables hidráulicas como el calado ( $h$ ), la velocidad ( $v$ ), o diferentes combinaciones de éstas, como el caudal específico ( $q$ ), que engloba las variables hidráulicas calado y velocidad en una sola. Se ha desarrollado una metodología para evaluarlas empleando la herramienta de simulación hidráulica Iber (Bladé et al., 2014a) y herramientas propias de GiD (Ribó et al., 1999), la interfaz que incorpora Iber. Dado el carácter bidimensional de la herramienta (Bladé et al., 2014b), es posible evaluar las variables hidráulicas básicas, así como sus derivadas, en cada elemento de la malla de cálculo. Mediante un sistema de ayuda a la toma de decisiones desarrollado *ad hoc*, los resultados se expresan en forma de mapa clasificado en función de la variable hidráulica seleccionada. Este mapa puede emplearse como punto de partida para definir una VID óptima desde el punto de vista hidráulico, reduciendo considerablemente el número de iteraciones ya que proporciona información directa de la intensidad del flujo.

## INTERPRETACIÓN DE LA LEGISLACIÓN

El apartado 2 del artículo 9 del RD 9/2008 es la única referencia del criterio a seguir para definir la VID. Como se ha indicado, aun siendo claro, este criterio puede no resultar suficientemente conciso para llevar a cabo su determinación. Su cumplimiento se limita a establecer una zona para la cual la sobreelevación resultante de evaluar un caudal asociado a una cierta probabilidad de ocurrencia ( $T = 100$ ), comparando la situación actual frente a una hipotética situación «*considerando toda la llanura de inundación existente*», cumpla un determinado valor.

En primer lugar, el criterio de sobreelevaciones (0.3 m) para la definición de la VID puede no estar debidamente justificado. Un incremento de 0.3 m en la lámina de agua puede suponer grandes desperfectos en bienes e inmuebles (FEMA, 2015), pero puede no ser suficiente para generar daños en personas, donde la velocidad es más importante que el calado (Martínez-Gomariz et al., 2016a, 2016b; Russo et al., 2013). Además, el valor de la sobreelevación puede reducirse o ampliarse «*a criterio del organismo de cuenca*». Este rango de valores, desde 0.1 a 0.5 m, puede considerarse amplio desde el punto de vista de la extensión de la inundación, sobre todo en zonas muy llanas o urbanas. Además, este valor puede incrementarse cuando la «*inundación produzca daños reducidos*».

En este sentido, no se indica qué se considera por «*daños reducidos*». En contraposición, el concepto de «*daños graves*» sí se define claramente mediante el cumplimiento de uno o más de los criterios hidráulicos siguientes:  $h \geq 1$  m;  $v \geq 1$  m/s;  $h \cdot v \geq 0.5$  m<sup>2</sup>/s (que por otra parte es un criterio de peligrosidad, y no de daño). La interpretación de «*daños reducidos*» queda, pues, sujeta al criterio del técnico encargado de determinar la VID o del organismo de cuenca. Algunas administraciones han propuesto puntualizaciones o adaptaciones a este criterio. Por ejemplo, la Agència Catalana de l'Aigua (ACA) contempla en sus recomendaciones para estudios de inundabilidad (ACA, 2003), una discretización del daño en tres niveles en función de la gravedad de la inundación: baja ( $h < 0.4$  m;  $v < 0.4$  m/s;  $h \cdot v < 0.08$  m<sup>2</sup>/s); moderada ( $0.4 \geq h > 1$  m;  $0.4 \geq v > 1$  m/s;  $0.08 \geq h \cdot v > 0.5$  m<sup>2</sup>/s) y grave (coincidente con el criterio del RD 9/2008). Puesto que la definición de la ZIP se realiza para un periodo de retorno de 100 años, resulta evidente que si la ZFP se define como la unión de la ZIP y la VID, esta última también deba definirse para  $T = 100$ . Sin embargo, no está justificado el motivo por el cual se toma ese periodo de retorno y no otro.

Por otro lado, la comparación entre la situación actual y «*considerando toda la llanura de inundación existente*» puede estar sujeta, también, a interpretación ya que tampoco se define el concepto de «*toda la llanura de inundación existente*». En este sentido, la evolución morfológica del río permite definir, en muchos casos, las zonas de mayor frecuencia de inundación, pero ésta puede no ser coincidente con la llanura de inundación actual debido a procesos antrópicos (p.ej. encauzamiento, construcción de puentes, extracción de áridos, etc.). Una primera aproximación sería eliminar del análisis elementos que distorsionen u obstruyan el flujo en la actualidad, como por ejemplo muros, motas, estribos de puentes y/o edificios. Sin embargo, sería necesario definir qué elementos eliminar y cuáles no para homogeneizar el análisis.

Por su versatilidad y capacidad de análisis en tramos de gran envergadura, es recomendable que el proceso para la determinación de una VID se lleve a cabo a través de modelos numéricos hidráulicos. En este aspecto, la legislación no indica cuáles deben ser

las características mínimas de estas herramientas, ni tampoco la calidad de los datos de entrada para su construcción y definición. Los modelos bidimensionales están actualmente consolidados, pero siguen realizándose estudios de inundabilidad con modelos unidimensionales, lo que supone una simplificación considerable, en muchos casos excesiva, en casos de geometrías complejas. Actualmente, las técnicas tridimensionales con malla (Ochoa García et al., 2017), así como las de partículas (Balairón Pérez et al., 2014; López et al., 2018), comienzan a ser competitivas para abordar problemas de esta índole, pero el coste computacional y complejidad de manejo todavía son un hándicap. De este modo, existirán diferencias evidentes en los resultados hidráulicos, y por tanto en la VID, en función del modelo y del tipo de discretización espacial (unidimensional o bidimensional y resolución), pero también de la experiencia del técnico.

## PROCEDIMIENTO HABITUAL PARA DETERMINAR UNA VID

Como se ha indicado anteriormente, existen infinitas soluciones para la definición de la VID. Puesto que la legislación no hace mención expresa al procedimiento a seguir para obtenerla, existirán también infinitos procesos para la obtención de cada una de ellas. Sin embargo, la experiencia ha limitado el número de procesos posibles a un número reducido, y que son los habitualmente empleados.

En primera instancia, posiblemente como el proceso más utilizado, sería definir una VID de igual extensión a la ZIP. Puesto que la ZFP se define como la envolvente de las anteriores, si existe una VID igual que la ZIP que cumpla con el criterio de sobreelevaciones, el proceso habrá concluido. La ZFP será, en este caso, igual a la ZIP. Sin embargo, todavía quedaría por concretar la VID que cumpla en todo el tramo de estudio con dicho criterio, pero este aspecto queda normalmente en un segundo plano porque la ZFP ya ha sido determinada. No ocurriría lo mismo si una VID igual que la ZIP no cumpliera con el criterio y, por tanto, sería necesario comenzar un proceso iterativo.

De entre las metodologías usualmente empleadas como proceso iterativo para la definición de la VID estaría la que considera la VID de manera «*stricta*», es decir, evaluando diferentes anchos paralelos al cauce para comprobar si la sobreelevación es menor que lo estipulado (zonas en gris de la Figura 2a).

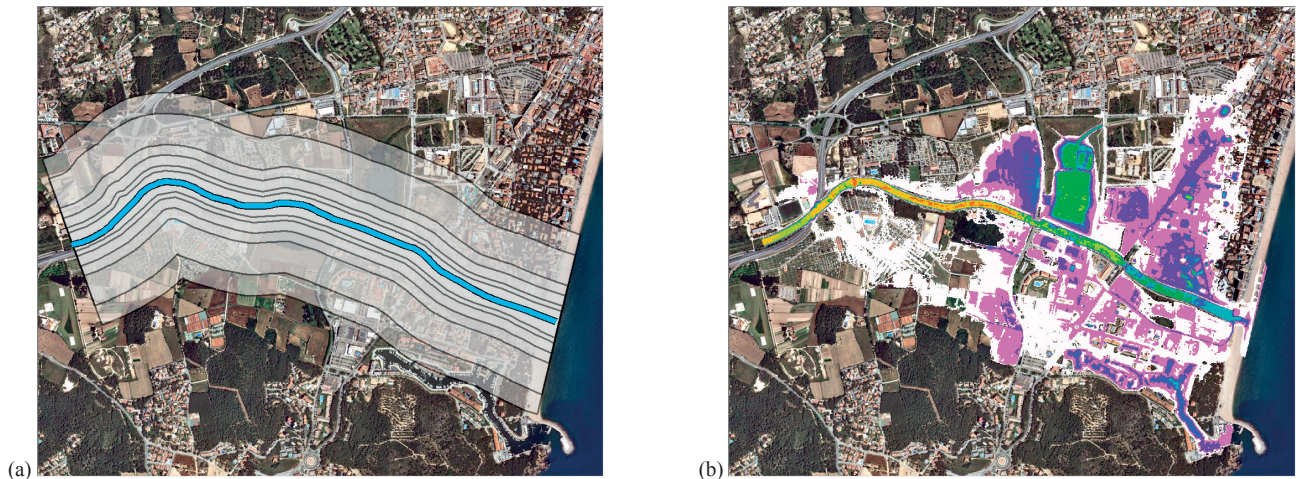

**Figura 2 |** Ejemplos de caracterización de una VID en un entorno urbano cuyo cauce se encuentra desconectado de las llanuras de inundación mediante un encauzamiento. (a) Definición de la VID mediante zonas equidistantes (en gris) al eje del río (en azul). (b) Definición de la VID mediante un análisis hidráulico simplificado (por calados). Imagen de fondo: Institut Cartogràfic i Geològic de Catalunya.

En este proceso, la lógica sería empezar desde una VID muy ancha, estrechándola paulatinamente hasta el límite, justo antes de que se supere el criterio de sobreelevación. Sin embargo, este proceso puede no tener sentido cuando, por ejemplo, una de las dos llanuras de inundación no existe (p.ej. cauce encajado en una de las riberas) o se alcanza el criterio de sobreelevaciones en zonas puntuales donde el flujo se acumula y que con una VID menor ya no sucedería (p.ej. inundación con un marcado carácter bidimensional). Otra posibilidad sería tomar la mancha de inundación e introducir conceptos hidráulicos, como por ejemplo el

calado, para discriminar zonas por donde a priori circula mayor cantidad de flujo (Figura 2b). Definido un umbral de calado, se procede a eliminar áreas cuyo calado esté por debajo de dicho umbral (color blanco, Figura 2b). No obstante, un mayor calado no siempre se traduce en una mayor concentración de caudal, por lo que el resultado de este proceso puede estar obviando parte de la zona por donde se concentra preferentemente el flujo, y por tanto subestimando la VID.

Cabe destacar que, aun solo mostrando tres procedimientos para obtener la VID, los resultados obtenidos serían diferentes. Y así con multitud de técnicas distintas que proporcionarían infinitas vías de intenso desagüe, todas ellas estrictamente válidas bajo criterios normativos, pero no adecuadas desde el punto de vista hidráulico.

## MATERIALES Y MÉTODOS

### Herramienta de simulación hidráulica

Iber es una herramienta de simulación del flujo en lámina libre que resuelve las ecuaciones de Saint Venant bidimensionales (2D). Para ello emplea el método de volúmenes finitos (Toro, 2009), discretizando el espacio en una malla de elementos triangulares y/o cuadriláteros. Actualmente Iber dispone de 5 módulos de cálculo: transporte de sedimentos (Bladé et al., 2019a); dispersión de contaminantes (Anta Álvarez et al., 2015; Cea et al., 2016); procesos hidrológicos (Cea y Bladé, 2015); y hábitat fluvial (Sanz-Ramos et al., 2019a), siendo el módulo hidráulico común para todos ellos y la base para estudios de inundabilidad (Bladé et al., 2014b, 2014a, 2019b; González-Aguirre et al., 2016; Ruiz-Villanueva et al., 2014; Sopelana et al., 2017), y que son parte de los trabajos de planificación del espacio fluvial en los que se enmarca la definición de la VID.

El código de cálculo se encuentra integrado en la interfaz de pre- y post-proceso GiD (Ribó et al., 1999). Cuenta con herramientas propias para facilitar el flujo de trabajo como la lectura de rasters con información topográfica o de precipitación; la creación directa del modelo mediante la técnica RTIN (*Right-Triangulated Irregular Networks*); la incorporación de puentes considerando flujo en 2D; la implementación de obras hidráulicas; etc. Iber ya dispone de herramientas de ayuda para la definición de la VID, orientadas a la definición de un polígono o una línea más un ancho de actuación. Estas opciones requieren de un proceso iterativo hasta alcanzar la solución deseada, ya que dependen directamente de la experiencia del usuario.

Como mejora a las metodologías existentes, se ha desarrollado una nueva herramienta para la toma de decisiones en la interfaz de Iber que permite al usuario indicar y visualizar el mapa clasificado de la variable hidráulica seleccionada según un umbral (Figura 3a). Una vez seleccionada la variable y el umbral, el programa guarda el perímetro exterior del mapa y lo toma en futuras simulaciones como el área por donde el flujo puede circular. Así pues, tan solo es necesario indicar un valor umbral y verificar que se cumplen los requerimientos para la definición de la VID.

### Criterios hidráulicos

Los criterios analizados se basan en el uso de variables hidráulicas, o combinación de ellas, como el calado ( $h$ ) y la velocidad ( $v$ ) de la corriente, obteniéndose esta última como el cociente entre el caudal específico ( $q$ ) y el calado. Estos tres criterios ( $h$ ,  $v$ , y  $q$ ) pueden ser fácilmente evaluados mediante herramientas de modelización numérica bidimensional. Además, se emplean para definir la ZIP que, según el RD 9/2008 (RD), se daría en corrientes para el polígono exterior definido por un calado de 1 m, una velocidad de a 1 m/s y un caudal específico de 0.5 m<sup>2</sup>/s.

Por ello, también se ha considerado el criterio del RD 9/2008 por ser una de las metodologías empleadas para verificar el cumplimiento de la VID de extensión igual a la ZIP (Figura 3a).

### Casos de estudio

Los criterios fueron aplicados en casos de estudio de muy diferentes características para obtener una VID bajo el criterio de sobrelevaciones de 0.3 m. Los ríos analizados han sido seleccionados para cubrir distintas tipologías de cauces peninsulares e

insulares, y siguen la siguiente nomenclatura: ríos con caudal continuo (CC) o ríos con caudal intermitente (CI); ríos cuyo cauce está bien definido (BD) o mal definido (MD); y ríos con llanuras de inundación (CL) o sin llanuras de inundación (SL). Así, una zona de estudio cuyo río tiene un caudal continuo y un cauce bien definido con llanuras de inundación, se denomina CC-BD-CL.

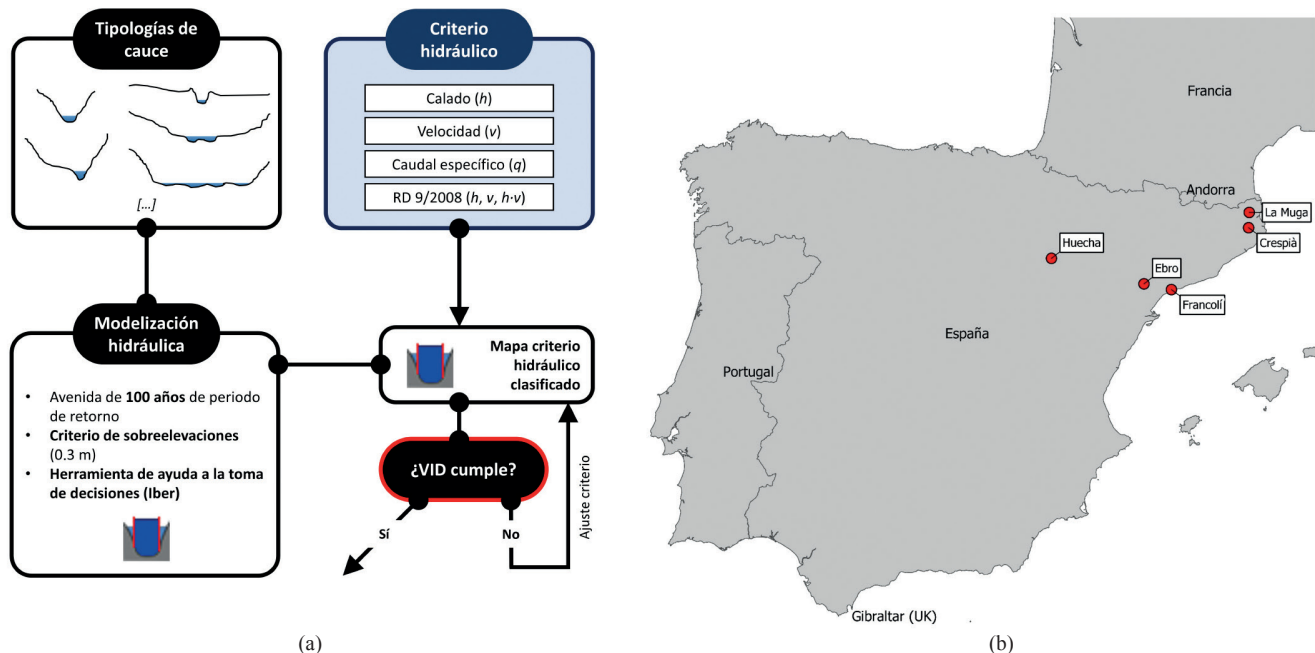

**Figura 3** | Esquema para la evaluación de la VID en base a diferentes criterios hidráulicos (a). Ubicación de los casos de estudio (b).

Se analizaron seis casos, todos ellos situados en el noreste de la Península Ibérica (Figura 3b), y que se describen brevemente a continuación: 1) Tramo de 10 km del río Ebro situado entre las localidades de Flix y Ascó (CC-BD-SL), que se caracteriza por estar encajado en el valle aluvial y por la presencia abundante de vegetación, tanto el cauce como en las riberas (Sanz-Ramos et al., 2018a); 2) La Muga, en un tramo de 15 km desde el embalse de Boadella hasta la carretera AP-7 (CC-BD-CL), tiene en su mayoría un cauce bien definido y llanuras de inundación limitadas, mientras que a partir de la localidad de Pont de Molins las llanuras de inundación se extienden generando problemas de inundación (ACA, 2007; Bladé et al., 2018), sobre todo por eventos extremos de precipitación en la intercuenca (Roux et al., 2019; Sanz-Ramos et al., 2018b); 3) el río Francolí (CC-BD-CL) que, en el tramo analizado de 6.5 km situado cerca de El Morell (a 10 km al norte de la ciudad de Tarragona), presenta una tipología de cauce con caudal continuo, llanuras de inundación limitadas por la elevada urbanización de sus riberas y cuenta con diversas infraestructuras que lo atraviesan (ferrocarril y carreteras); 4) el tramo final del río Ridaura, de 2.5 km (CI-BD-CL), se caracteriza por una elevada alteración antrópica (encauzamiento y casco urbano de Platja d'Aro), y cuyo cauce está desconectado de las llanuras de inundación en casi toda su longitud y presenta un régimen torrencial; 5) el río Huecha (CI-MD-CL) a la altura de la localidad de Mallén (a 60 km al oeste de la ciudad de Zaragoza), con una longitud de 7.8 km, presenta una orografía muy antrópica, las llanuras de inundación son terrazas de cultivo y se encuentran interrumpidas por diversas carreteras, una línea de ferrocarril y dos canales para el regadío; y 6) la unión de dos arroyos de caudal intermitente aguas abajo de la localidad de Crespia (a 30 km al norte de la ciudad de Girona) que, con una longitud conjunta de 1.7 km (CI-MD-CL), tienen los cauces desconectados de las llanuras de inundación y presentan cierta alteración antrópica (campos de cultivo).

Los modelos numéricos construidos para evaluar la VID discretizan cada zona de estudio con elementos triangulares y/o rectangulares de diferentes tamaños (Tabla 1), emplean topografía de alta resolución (Modelos Digitales del Terreno, MDT, de 2 y 5 metros de tamaño de celda y topografía 1:1000) y usos del suelo espacialmente distribuidos a los que se le ha asociado el coeficiente de rugosidad según Arcement y Schneiderb (1989) y Barnes (1987). También incluyen puentes, azudes y obras de drenaje transversal para permitir el flujo en la dirección de la corriente (Tabla 1).

**Tabla 1** | Características de los modelos numéricos de cada uno de los casos de estudio analizados.

| Río       | Código   | Longitud [km] | Extensión [ha]* | Topografía       | Tamaño elemento [m] | Número elementos | Elementos por ha | Obras hidráulicas y/o puentes |
|-----------|----------|---------------|-----------------|------------------|---------------------|------------------|------------------|-------------------------------|
| Ebro      | CC-BD-SL | 10            | 685.7           | MDT 2×2 y 4×4    | 10-50               | 16924            | 26               | Sí                            |
| La Muga   | CC-BD-CL | 15            | 312.6           | MDT 2×2          | 5-15                | 69808            | 233              | Sí                            |
| Francolí  | CC-BD-CL | 6.5           | 746.8           | MDT 2×2 y 1:1000 | 4-20                | 262038           | 351              | Sí                            |
| Ridaura   | CI-BD-CL | 2.5           | 333.4           | MDT 2×2 y 1:1000 | 2-25                | 143535           | 431              | Sí                            |
| Huecha    | CI-MD-CL | 7.8           | 1918.0          | MDT 5×5 y 1:1000 | 5-25                | 406571           | 212              | Sí                            |
| Crespià** | CI-MD-CL | 1.7           | 35.9            | MDT 2×2 y 1:1000 | 2                   | 149713           | 4170             | NO                            |

\* La extensión del modelo numérico se ha ajustado a los límites de la inundación de  $T=100$ .

\*\* Nombre de la localidad más cercana. La longitud descrita corresponde a la suma de los dos cauces analizados.

## RESULTADOS

En este apartado se evalúan, para distintas tipologías de cauce y de forma cualitativa, la bondad de ajuste de diferentes criterios hidráulicos ( $h$ ,  $v$ ,  $q$  y  $RD$ ) para la obtención de la VID, tomando el criterio de sobreelevaciones de 0.3 m y la inundación de 100 años de periodo de retorno (Figura 3a). No se busca el cumplimiento del umbral de sobreelevaciones de manera estricta, es decir, pueden existir pequeñas zonas donde no se cumpla y considerarse la VID como válida para ese criterio. Debido al gran número de mapas, a continuación se destacan los más relevantes para el análisis. En la Tabla 2 se resumen los resultados obtenidos cada zona de estudio según el criterio evaluado.

**Tabla 2** | Resumen del valor obtenido para la definición de una VID según cada criterio evaluado.

| Río      | Código   | $h$ [m] | $v$ [m/s] | $q$ [m <sup>2</sup> /s] | RD* (ZIP) |
|----------|----------|---------|-----------|-------------------------|-----------|
| Ebro     | CC-BD-SL | 0.5     | 0.3       | 0.3                     | Sí        |
| La Muga  | CC-BD-CL | 0.4     | 0.6       | 0.4                     | Sí**      |
| Francolí | CC-BD-CL | 0.4     | 0.5       | 0.5                     | Sí        |
| Ridaura  | CI-BD-CL | 0.05    | 0.07      | 0.07                    | No        |
| Huecha   | CI-MD-CL | < 0.05  | 0.1       | 0.02                    | No        |
| Crespià  | CI-MD-CL | < 0.05  | 0.15      | 0.05                    | No        |

\* Se evalúan los resultados de sobreelevación en función de "Sí" cumplen o "No" el criterio de sobreelevaciones. En este caso la ZIP y la VID son coincidentes.

\*\* Este criterio cumple en todo el tramo de estudio excepto una pequeña zona (ver descripción del caso).

### Ebro (CC-BD-SL)

El río Ebro, en el tramo analizado, tiene un comportamiento hidráulico similar al de un canal. Sus riberas se encuentran, en general, desconectadas del cauce, por lo que se requieren caudales elevados para inundarlas. Esto provoca que exista una zona por donde se concentra preferencialmente el flujo, el cauce. En este caso todas las soluciones obtenidas presentan una VID muy similar (Tabla 2), salvo pequeñas diferencias en el meandro de Ascó donde la alteración del interior del meandro es patente por la existencia de la Central Nuclear de Ascó.

### La Muga (CC-BD-CL)

El caso de La Muga no presenta, desde la presa de Boadella y Pont de Molins, diferencias en la extensión de la VID entre los criterios evaluados. Los principales problemas para definir la VID se encuentran en la zona inundable, situada aguas abajo de Pont de Molins. Para el calado se obtiene una buena solución con  $h = 0.4$  m (Figura 4a), con pequeñas sobreelevaciones en escasas

zonas. Sucede algo similar para una  $v = 0.6$  m/s (Figura 4b) y para un  $q = 0.4$  m<sup>2</sup>/s (Figura 4c), siendo la extensión de la VID de esta última una situación intermedia entre las otras dos. El caso *RD* tiene una zona ligeramente mayor donde no se cumple el criterio de sobreelevaciones (Figura 4d), aunque podría ser igualmente válido ya que las sobreelevaciones son pequeñas.

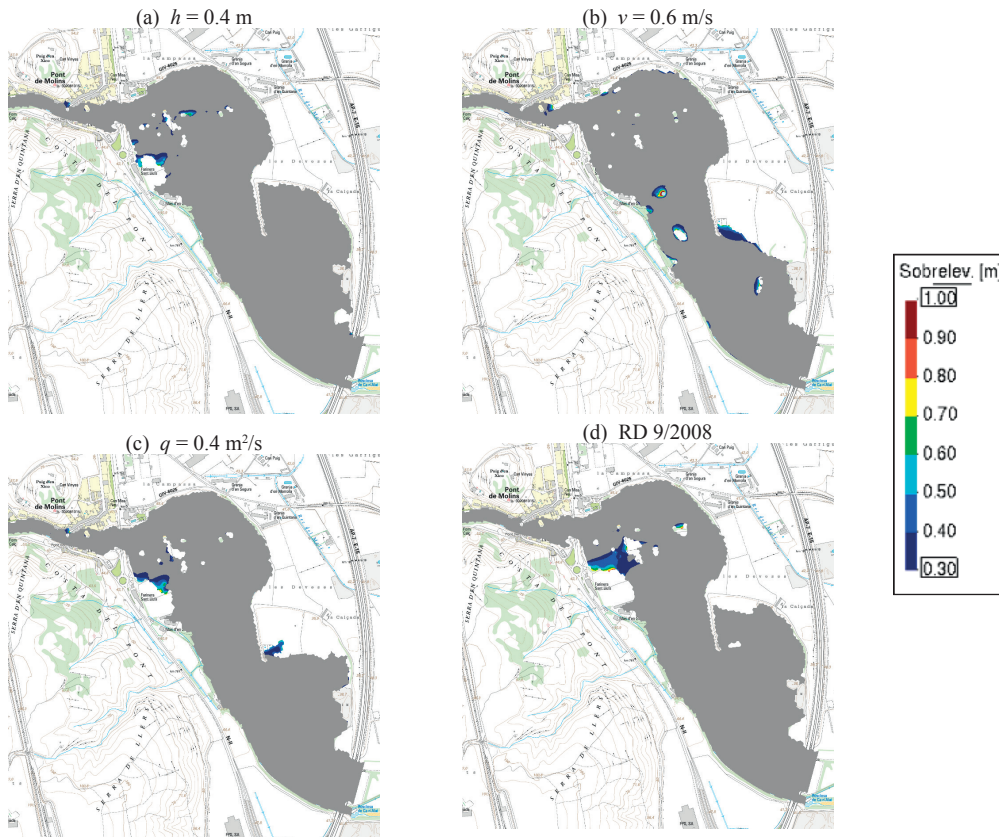

**Figura 4** | Caso de estudio de La Muga (zoom de la zona inundable entre Pont de Molins y la carretera AP-7). Mapa de sobreelevaciones para el criterio de calado (a), de velocidad (b), de caudal específico (c) y según el RD 9/2008 (d). Los colores grises representan sobreelevaciones inferiores a 0.3 m, valores por encima de 1 m se representan de color granate. Mapa de fondo: Institut Cartogràfic i Geològic de Catalunya.

## Francolí (CC-BD-CL)

Con un caudal continuo, un cauce bien definido y limitado por zonas urbanizadas, el río Francolí en el tramo cercano a la localidad de El Morell presenta zonas inundables acotadas. Esto permite definir una VID muy similar para todos los criterios evaluados (Tabla 2), hayándose pequeñas diferencias en pilas de puentes, en zonas remansadas por sus estribos y en pequeñas zonas desconectadas de la llanura de inundación. Los terraplenes de las infraestructuras (ferrocarril y carretera) producen un «efecto presa», remansando la avenida e inundado una amplia extensión aguas arriba, generando, así, una VID más extensa.

Cabe destacar que el criterio RD 9/2008 permitiría definir una VID válida con una única iteración, aunque este criterio es más laxo en comparación con los otros (ver valores de la Tabla 2). Esto podría significar que, al combinar el calado, la velocidad y el caudal específico, el criterio se autocompensa con cada una de ellas para obtener así una VID y, por tanto, la ZFP.

## Ridaura (CI-BD-CL)

Para la avenida  $T = 100$  la inundación se extiende en ambas riberas del Ridarua, llegando incluso a desaguar por la marina existente (margen derecho). Esto provoca que el criterio RD 9/2008 no cumpla porque el cauce no tiene capacidad suficiente para desaguar la avenida, por lo que es necesario un proceso iterativo para hallar la VID.



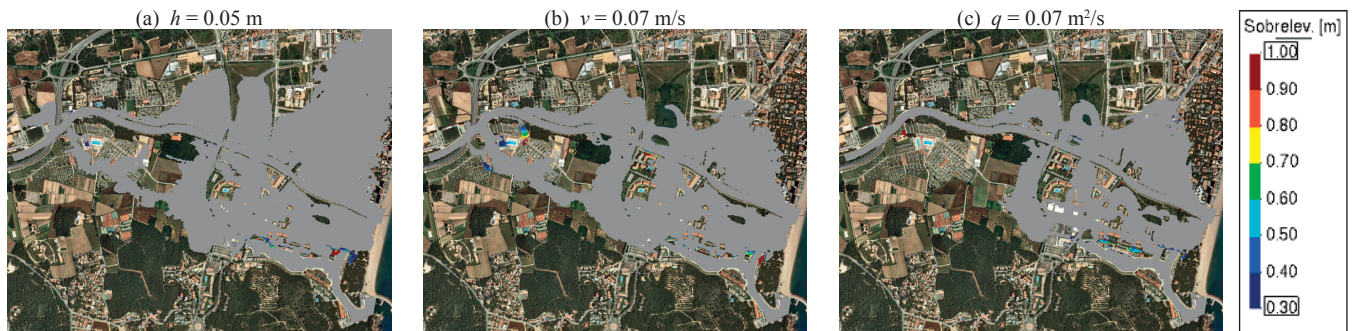

**Figura 5** | Caso de estudio del Ridaura. Mapa de sobreelevaciones para el criterio de calado (a), de velocidad (b) y de caudal específico (c). Los colores grises representan sobreelevaciones inferiores a 0.3 m, valores por encima de 1 m se representan de color granate. Imagen de fondo: Institut Cartogràfic i Geològic de Catalunya.

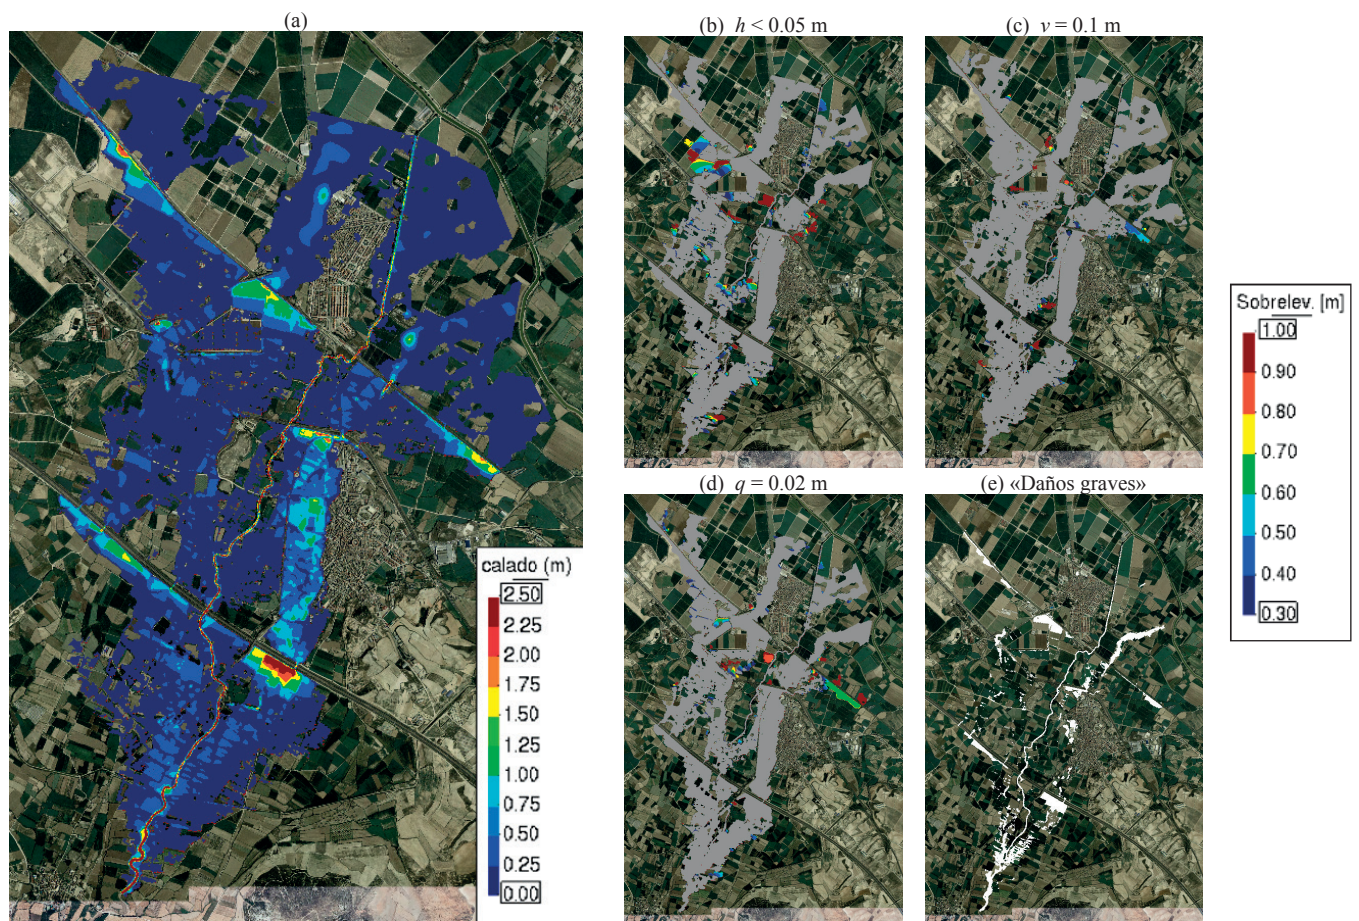

**Figura 6** | Caso de estudio del Huecha. Mapa de calados para  $T = 100$  (a). Mapa de sobreelevaciones para el criterio de calado (b), velocidad (c), caudal específico (d) y extensión de la zona «Daños graves» (en blanco) según el RD 9/2008 (e). Los colores grises representan sobreelevaciones inferiores a 0.3 m, valores por encima de 1 m se representan de color granate. Imagen de fondo: Instituto Geográfico Nacional.

Las VID obtenidas con los otros criterios presentan diferencias notables entre ellas, siendo la basada en el caudal específico ( $q$ ) la que representa mejor las zonas por donde se concentra preferentemente el flujo, con una extensión más acotada que el resto (Figura 5c). Para  $h$ , la zona se extiende más por la ribera izquierda, mientras que en la ribera derecha es muy similar a la de  $q$  (Figura 5a). Por el contrario, la VID definida según  $v$ , aunque tiene una extensión similar a  $q$  en la margen izquierda, requiere de ramas adicionales en la margen derecha (Figura 5b).

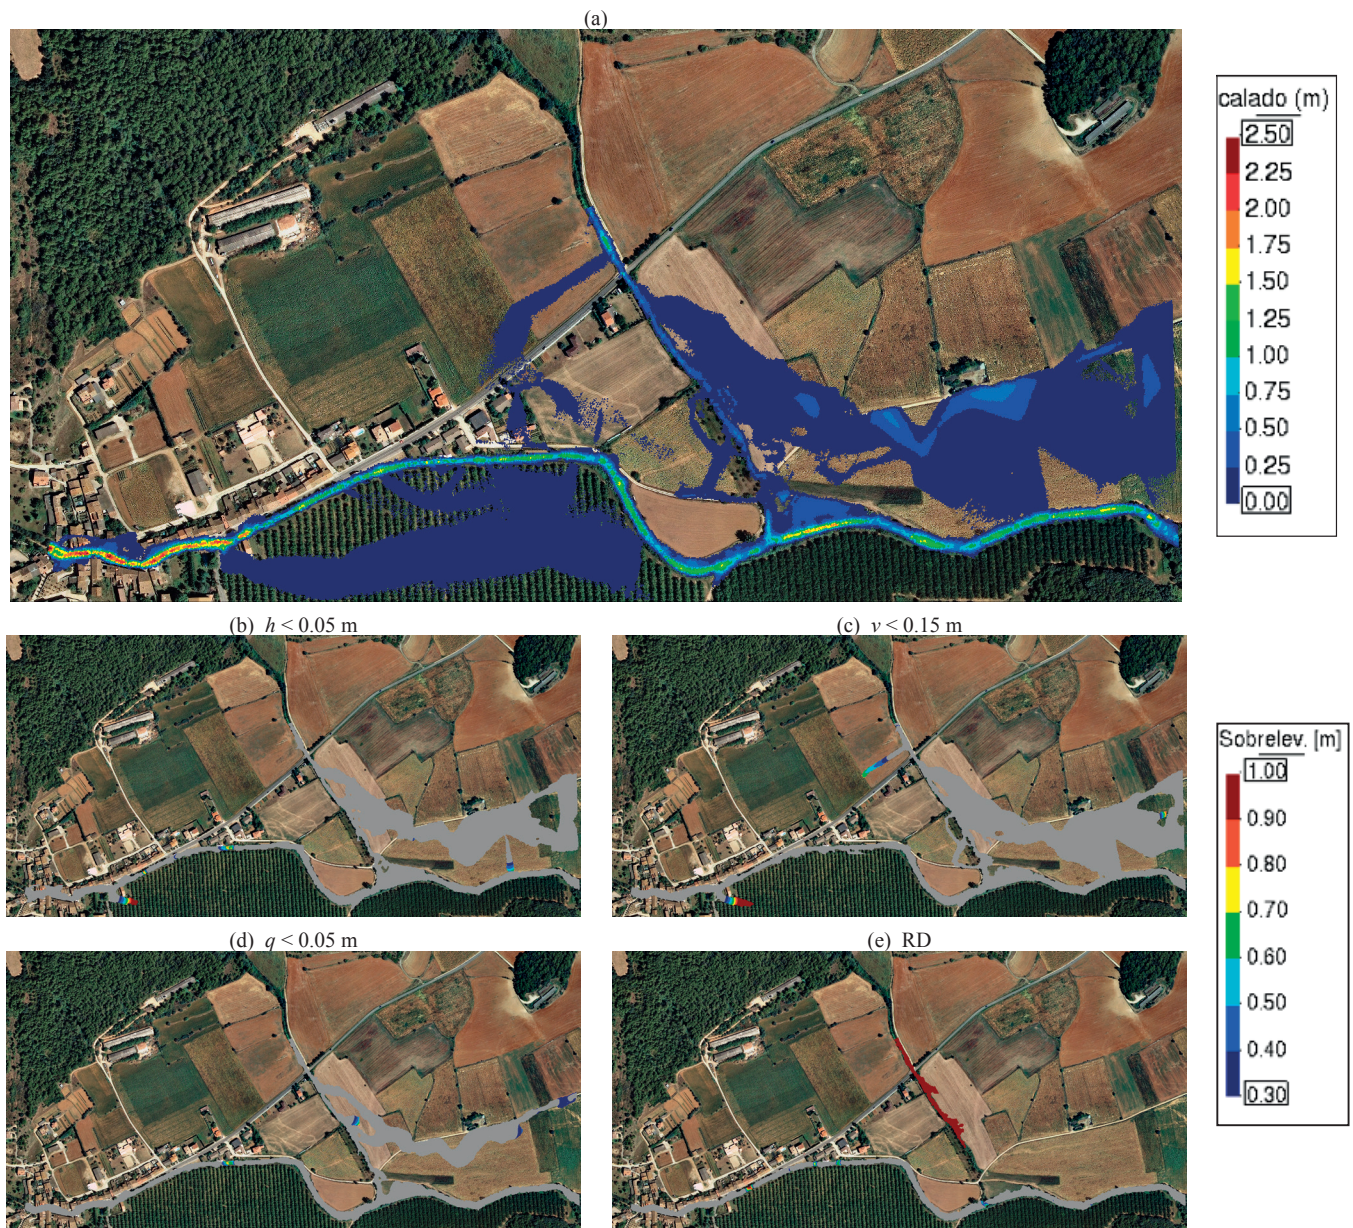

**Figura 7** | Caso de estudio de Crespí. Mapa de calados para  $T = 100$  (a). Mapa de sobreelevaciones para el criterio de calado (b), velocidad (c), caudal específico (d) y según el RD 9/2008 (e). Los colores grises representan sobreelevaciones inferiores a 0.3 m, valores por encima de 1 m se representan de color granate. Imagen de fondo: Institut Cartogràfic i Geològic de Catalunya.

## Huecha (CI-MD-CL)

El tramo del río Huecha analizado está afectado por diversas infraestructuras que, en términos de inundación, ejercen un «efecto presa» a pesar de las obras de drenaje existentes (21 *culverts*) y caminos que cruzan por debajo los viales (dos carreteras y un ferrocarril), todos implementados en el modelo numérico. Las llanuras de inundación, alteradas por la agricultura, se disponen en terrazas, muchas de ellas deprimidas con respecto a la cota del terreno colindante y, además, se encuentran desconectadas del cauce. Esto provoca que para  $T = 100$  la inundación sea extensa y no siga un patrón evidente para definir la VID (Figura 6a).

Por ello, el criterio  $RD$  no permite definir una VID y es necesario emplear otros criterios (Figura 6e). Para el calado, el umbral debería ser inferior a 0.05 m debido, principalmente, a los cambios de rasante entre terrazas, lo que provoca la interrupción del paso del agua y acumulaciones elevadas (Figura 6b). En cambio, el criterio de  $v = 0.1$  m/s permite definir diversos ramales por donde circula gran parte del flujo y, por tanto, una VID que cumple con la sobreelevación máxima excepto en pequeñas áreas (Figura 6c). Finalmente, un  $q = 0.02$  m<sup>2</sup>/s define una VID ligeramente menos extensa que para la  $v$ , generando también pequeñas zonas donde la VID no cumpliría con la sobreelevación (Figura 6d). Estas áreas corresponden a zonas desconectadas donde el agua se acumula, resultando en algunos casos no menospreciables, aunque no aportan caudal significativo.

## Crespià (CI-MD-CL)

En el caso de Crespià se analizan conjuntamente dos cursos fluviales, el Torrent Merler (principal) y el Rec de les Collugades (afluente), ambos con alteración antrópica en sus riberas (campos de cultivo). Este aspecto queda patente en la zona inundable para  $T = 100$  (Figura 7a) ya que la corriente no tiene un curso bien definido, rellenando y fluyendo por zonas deprimidas alejadas del cauce principal (ambas márgenes).

El criterio basado en el RD 9/2008 no cumple con los requisitos de sobreelevación debido a que la ZIP del afluente finaliza antes de la ZIP del curso principal (Figura 7e). Para el calado (Figura 7b) y la velocidad (Figura 7c) se obtiene una VID amplia en aguas abajo de la confluencia. Las zonas de acumulación para el calado (Figura 7b, margen derecho del cauce principal) y para la velocidad (Figura 7c, margen derecho de ambos cauces) son fruto de acumulaciones ocasionadas por ramales incipientes. Por el contrario, la VID definida en base al caudal específico (Figura 7d) divide la VID en dos ramales, uno por el cauce principal y otro por la ribera izquierda, siendo mucho más ajustada que las otras.

---

## DISCUSIÓN Y CONCLUSIONES

### Consideraciones generales de las normativas

El real Decreto 849/1986, en su artículo 9, se refiere a la Vía de Intenso Desagüe como «zona o zonas donde se concentra preferentemente el flujo durante las avenidas», es decir, implícitamente indica que la vía de intenso desagüe debe situarse en las zonas que aportan mayor caudal. Sin embargo, la práctica habitual es intentar obtener la VID a partir de un estrechamiento del flujo en la zona próxima al cauce principal, con criterios muchas veces geométricos (ancho constante o polígono) y otras fijándose en la variable calado. Con estas metodologías, el número de iteraciones para hallar una VID que cumpla el criterio de sobreelevaciones es función de la pericia de la persona que la evalúa y, en algunos casos, puede estar condicionada al criterio de los organismos de cuenca. Por ello, se puede afirmar que la definición de la VID no es única y, por tanto, sujeta a ser interpretada para alcanzar el objetivo deseado, contrariamente a lo que sucede con otras normativas.

Por ejemplo, la “Guía Técnica para la Clasificación de presas en función del riesgo potencial” (MMA, 1996) se realiza una descripción detallada de cómo proceder para clasificar una presa en función del riesgo que supone su rotura, pero a su vez posibilita la definición de nuevas metodologías y criterios siempre que se justifique debidamente (Sanz-Ramos et al., 2019b). Por tanto, la definición de la VID debe estar encaminada no solo a cumplir con la legislación vigente, sino que también debería también poderse definir y ajustar en consonancia bajo criterios lógicos y debidamente justificados.

En este sentido, en 2017 se publicó la “Guía Técnica para la aplicación del Reglamento del Dominio Público Hidráulico en las limitaciones a los usos del suelo en las zonas inundables de origen fluvial” (MAPAMA, 2017), en adelante *Guía Técnica*. Desarrollada bajo la premisa de «[...] contribuir a que, de una forma progresiva y ordenada, los usos del suelo en las zonas inundables sean, en la medida de lo posible, compatibles con el riesgo al que están sometidos. [...]», define claramente que el Dominio Público Hidráulico (DPH) es «[...] imprescriptible, inembargable e inalienable [...]». Así pues, en el DPH «[...] no se pueden construir nuevas instalaciones salvo las permitidas en la legislación de aguas [...]» y, por tanto, una adecuada definición de la ZFP, y por ende de la ZIP y, sobre todo, de la VID, son esenciales para dar cumplimiento

a estas premisas y minimizar el riesgo de inundación en la medida de lo posible. A todo ello hay que añadir los criterios geomorfológicos, tal como establecen las legislaciones anteriormente indicadas y como aclara la “*Guía Metodológica para el Desarrollo del Sistema Nacional de Cartografía de Zonas Inundables*” (MAGRAMA, 2011).

La *Guía Técnica* dedica tres capítulos (IV, V y VI) orientados a definir las limitaciones para con los usos del suelo, quién tiene las competencias, quién debe evaluar cambios en los usos del suelo (únicamente los organismos de cuenca), qué tipo de actuaciones están permitidas y hacia qué fin están orientadas. Se establecen criterios y condicionantes para construcciones fuera de la ZFP, ya que pueden afectar a esta e incrementar la vulnerabilidad y el riesgo en la zona de análisis y aguas abajo. Asimismo, se disponen una serie de recomendaciones para los criterios constructivos de nuevas edificaciones, todas orientadas a no aumentar el riesgo de inundación.

Por tanto, metodologías y herramientas orientadas a evaluar la VID, y en consecuencia la ZFP, permitirán aplicar los criterios normativos con agilidad y eficacia, todos ellos orientados a reducir la exposición, la vulnerabilidad y el riesgo frente a inundaciones, y reducir en la medida de lo posible las implicaciones negativas que suponen para la sociedad, la economía y el medio ambiente.

## Criterios hidráulicos para definir una VID

La incorporación de variables hidráulicas para definir una VID que esté en concordancia con el criterio de sobreelevaciones definido, puede suponer una mejora sustancial. Permitirá reducir el número de iteraciones y evitará ambigüedades en los criterios empleados para el mismo río, incluso para el mismo tramo si el estudio se realiza y evalúa bajo criterios distintos (p.ej. dos personas diferentes).

Emplear la ZIP como primera aproximación para definir la VID puede reducir drásticamente el número de iteraciones. Si se evalúa una VID de igual extensión que la ZIP (criterio denominado *RD*), y cumple con el criterio de sobreelevaciones, el proceso de obtención de la ZFP habrá concluido. La ZIP se define en base a criterios hidráulicos, por lo que también se estarían empleando para definir la VID. Es por ello que se han analizado cada uno de ellos por separado (calado,  $h$ ; velocidad,  $v$ ; y caudal específico,  $q$ ). Cabe destacar que el caudal específico se puede obtener como el producto del calado y la velocidad, por lo que sería un doble criterio.

En el presente documento se han analizado seis casos de estudio con características diferentes, donde se han evaluado los criterios anteriores, con la intención de cubrir la gran mayoría de tipologías de ríos peninsulares e insulares españoles. En tres de ellos (Ebro, La Muga y Francolí) las sobreelevaciones según el criterio *RD* cumplen (salvo pequeñas zonas), por lo que el proceso de obtención de la VID, y por tanto de la ZFP, ha concluido con una única iteración. El resto de casos (Ridaura, Huecha y Crespià) ha requerido de un proceso iterativo mayor (1-2 iteraciones), evaluando cada una de las variables hidráulicas por separado.

Se observa que los casos de estudio en los que el criterio *RD* cumple, corresponden a tramos de río cuyo cauce está bien definido y tiene un caudal continuo durante todo el año (Tabla 2). También se muestra que los criterios hidráulicos, evaluados de forma independiente, requieren de valores por debajo de los que exige el RD 9/2008 para definir la ZIP. En general, en los casos con un caudal intermitente, el criterio *RD* no cumple, aunque se requieren de valores de calado, velocidad y caudal específico relativamente reducidos (Tabla 2).

Cada uno de los criterios seleccionados proporciona una extensión de la VID diferente. La Figura 8 muestra la extensión de la VID para cada caso de estudio y criterio hidráulico. Se puede observar que en cuatro de los seis casos, el criterio basado en el caudal específico ( $q$ ) proporciona la VID menos extensa y, además, el área de VID que no cumple con el umbral de sobreelevaciones (0.3 m, representada en color naranja) también es menor. El resto de variables, incluido el criterio basado en el RD 9/2008, presenta un comportamiento dispar y sin una tendencia clara. Para poder extraer conclusiones con carácter general, sería conveniente aumentar el número de casos de estudio.

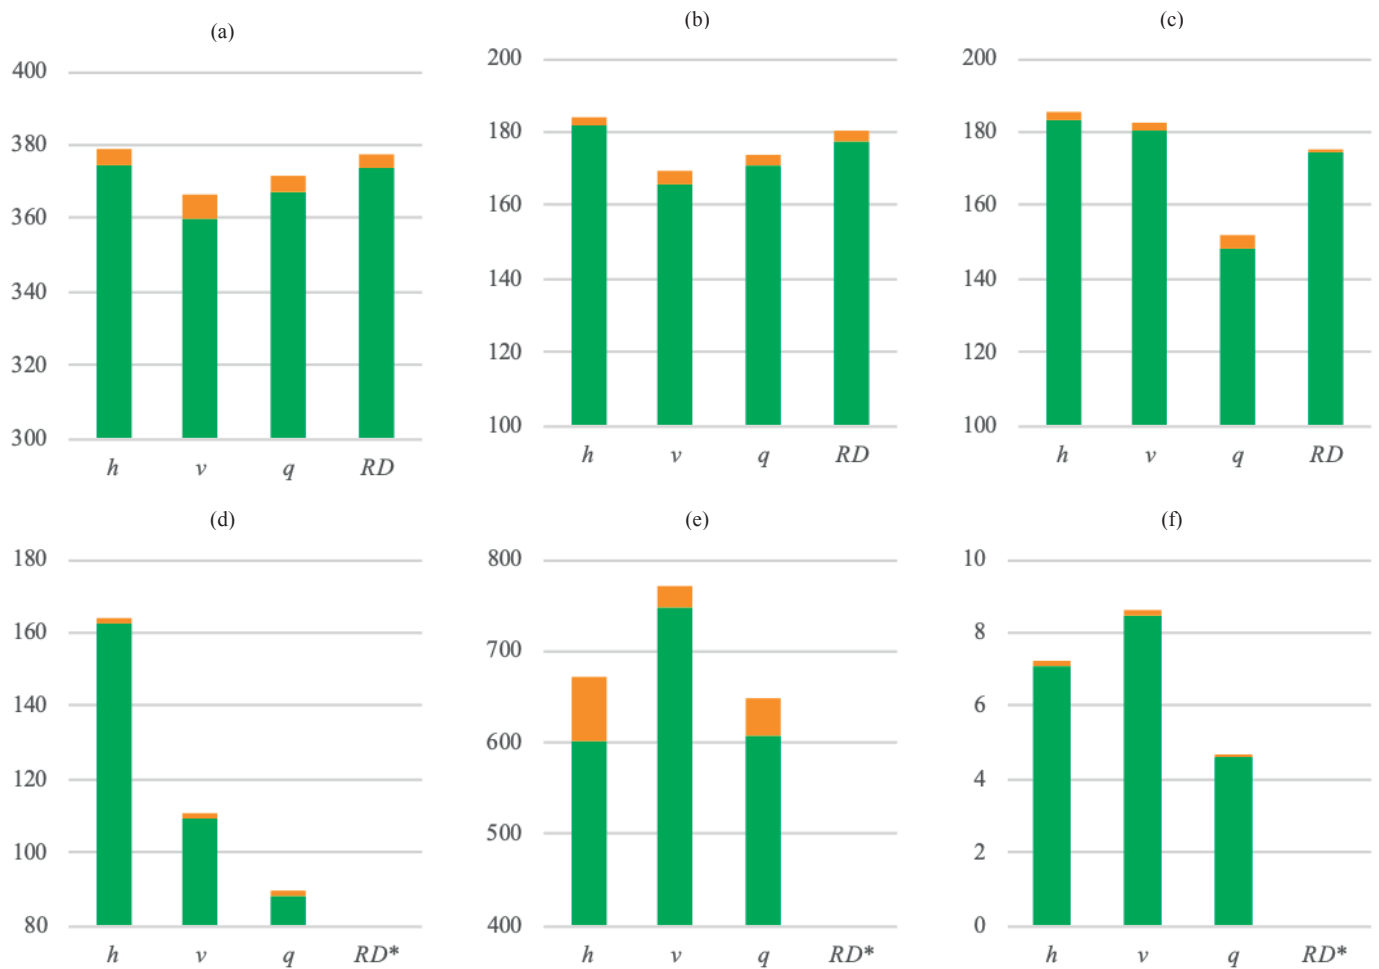

\* La extensión de la VID no se ha calculado por no cumplir el criterio de sobreelevaciones.

**Figura 8** | Extensión, en hectáreas, de la VID para los criterios evaluados (calado,  $h$ ; velocidad,  $v$ ; caudal específico,  $q$ ; y RD 9/2008,  $RD$ ) y los casos de estudio: Ebro (a), La Muga (b), Francolí (c), Ridaura (d), Huecha (e) y Crespià (f). En verde la zona que cumple con el criterio de sobreelevaciones (0.3 m) y en naranja la que no cumple.

## El caudal específico como criterio para definir la VID

A la vista de los resultados, se propone emplear la variable caudal específico ( $q$ ) como criterio de referencia para obtener la VID. Se entiende por caudal específico la cantidad de volumen por unidad de tiempo y de ancho ( $m^3/s/m$  ó  $m^2/s$ ). Esta variable hidráulica define, intrínsecamente, la intensidad de flujo. El caudal ( $m^3/s$ ) es una variable globalizadora que computa el volumen por unidad de tiempo que circula por una sección. Sin embargo, con  $q$  resulta inmediato conocer aquellas zonas que más cantidad de flujo aportan y, por tanto, dónde se concentra preferencialmente el flujo durante una avenida.

Los modelos numéricos de carácter bidimensional resuelven las ecuaciones de Saint Venant, cuyas principales variables son el calado ( $h$ ) y el caudal específico ( $q$ ), pudiéndose descomponer este último como el producto del calado por la velocidad ( $v$ ). En general, en un cauce inalterado, los mayores  $q$  se producen en el centro del río, donde el  $h$  y  $v$  son también mayores (Figura 9a). En cauces alterados, en los que p.ej. se haya urbanizado o cambiado considerablemente la topografía de las llanuras de inundación, la situación anteriormente descrita puede no cumplirse. En calles de una zona urbana, por ejemplo, se pueden llegar a obtener campos de velocidades altos debido a la obstrucción que suponen los edificios y al cambio la rugosidad del fondo.

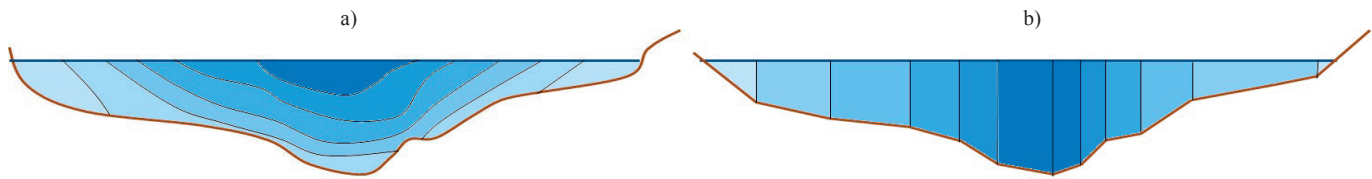

**Figura 9 |** Comportamiento de la intensidad del flujo en una sección (colores oscuros representan mayor cantidad). Distribución del caudal específico en una sección real (a) y en un modelo numérico bidimensional (b).

Desde el punto de vista matemático se puede suponer, en primera aproximación, que un río puede transportar un caudal con un régimen no muy alejado del régimen permanente. También es habitual considerar que la pendiente motriz es relativamente similar a lo largo de una sección transversal del cauce (sería exactamente la misma en el caso de movimiento uniforme). De este modo, empleando la ecuación de Manning (Chaudhry, 2008), si por cada una de las rebanadas verticales de la Figura 9b, que representan la discretización espacial en un modelo numérico, circula un caudal  $Q_i$  y el calado en ellas es  $h_i$ , se debería cumplir que la pendiente motriz para cada una de las rebanadas  $I_i$  debería ser igual a la pendiente motriz global de la sección  $I$ . Es decir:

$$I_i = \frac{Q_i^2 \cdot n_i^2}{A_i^2 \cdot h_i^{4/3}} = \frac{Q^2 \cdot n^2}{A^2 \cdot h^{4/3}} = I \quad (1)$$

donde  $n_i$  es el coeficiente de Manning y  $A_i$  es el área de la sección de la rebanada  $i$ . Por otro lado, debe cumplirse que

$$Q = \sum_{i=1}^n Q_i \quad (2)$$

Las ecuaciones anteriores son independientes del número  $i$  de rebanadas verticales. Si con la vía de intenso desagüe se tiene que  $i' < i$ , forzosamente  $Q_{i'}$ , o lo que es lo mismo  $Q_{i'} = Q_i + \Delta Q_i$ . Si ahora al ancho de una rebanada lo denotamos como  $B_i$ , tendremos que  $q_{i'} = q_i + \Delta q_i$  con  $\Delta q_i = \Delta Q_i / B_i$ , pero el caudal total  $Q$  no habrá cambiado. De la Ecuación (1) se desprende entonces que el calado en cada rebanada  $h_i$  se verá incrementado, en mayor o menor cantidad, en función del incremento relativo de  $Q_i$ , o lo que es lo mismo, en función de  $\Delta Q_i / Q_i$ , lo que corrobora lo que se ha afirmado párrafos anteriores. Así pues, para encontrar la vía de intenso desagüe entendida realmente como la zona con más intensidad de flujo (por lo tanto la VID de menor extensión), se debe ir eliminando del flujo las zonas con menor caudal específico.

De las ecuaciones anteriores se desprende también que, en caso de inhabilitar para el flujo una zona con caudal específico mayor, y por tanto también con mayor caudal, el incremento de caudal en las restantes sería también mayor, por lo que incremento de la lámina también sería más grande. Es decir, las ecuaciones corroboran el sentido común, por lo que el criterio para definir de manera óptima una VID debe ser el de eliminar las zonas de flujo con menor caudal específico.

## REFERENCIAS

- ACA. 2003. *Recomanacions tècniques per als estudis d'inundabilitat d'àmbit local*. Guia Tècnica, Agència Catalana de l'Aigua. Generalitat de Catalunya. Març 2003. [online] Available from: <http://www.gencat.net/aca>.
- ACA. 2007. Planificació de l'Espai Fluvial. Estudis d'inundabilitat en l'àmbit del projecte PEFCAT - Memòria específica Conca de La Muga.
- Anta Álvarez, J., Bermúdez, M., Cea, L., Suárez, J., Ures, P., Puertas, J. 2015. Modelización de los impactos por DSU en el río Miño (Lugo). *Ingeniería del agua*, 19(2), 105-116. <https://doi.org/10.4995/ia.2015.3648>
- Arcement, G.J., Schneider, V.R. 1989. *Guide for selecting Manning's roughness coefficients for natural channels and flood plains*.
- Balairón Pérez, L., López, D., Morán, R., Ramos, T., Toledo, M.Á. 2014. Avances en investigación aplicada mediante modelación física y numérica en el diseño de la ingeniería de presas, *Ingeniería del Agua*, 18(1), 55-69. <https://doi.org/10.4995/ia.2014.3143>

- Barnes, H.H. 1987. Roughness Characteristics of Natural Channels, Tech. Report, Geol. Surv. Water-Supply, United States Gov. Print. Off. Washington, U.S.A, 219. [https://doi.org/10.1016/0022-1694\(69\)90113-9](https://doi.org/10.1016/0022-1694(69)90113-9)
- Bladé, E., Cea, L., Corestein, G., Escolano, E., Puertas, J., Vázquez-Cendón, E., Dolz, J., Coll, A. 2014a. Iber: herramienta de simulación numérica del flujo en ríos, *Rev. Int. Métodos Numéricos para Cálculo y Diseño en Ing.*, 30(1), 1-10. <https://doi.org/10.1016/j.rimni.2012.07.004>
- Bladé, E., Cea, L., Corestein, G. 2014b. Modelización numérica de inundaciones fluviales, *Ing. del Agua*, 18(1), 71-82. <https://doi.org/10.4995/ia.2014.3144>
- Bladé, E., Sanz-ramos, M., Amengual, A., Romero, R., Roux, H., Savatier, J., Cheriére, M. 2018. Gestión integrada del riesgo de inundación y de los recursos hídricos empleando modelización integrada meteorológica, hidrológica e hidráulica, in *XI Jornadas Españolas de Presas*, León, Spain.
- Bladé, E., Sánchez-Juny, M., Arbat-Bofill, M., Dolz, J. 2019a. Computational Modeling of Fine Sediment Relocation Within a Dam Reservoir by Means of Artificial Flood Generation in a Reservoir Cascade, *Water Resour. Res.*, 55(4), 3156-3170. <https://doi.org/10.1029/2018WR024434>
- Bladé, E., Sanz-Ramos, M., Dolz, J., Expósito-Pérez, J. M., Sánchez-Juny, M. 2019b. Modelling flood propagation in the service galleries of a nuclear power plant, *Nucl. Eng. Des.*, 352, 110180. <https://doi.org/10.1016/j.nucengdes.2019.110180>
- BOE-A-2008-755. 2008. Real Decreto 9/2008, de 11 de enero, por el que se modifica el Reglamento del Dominio Público Hidráulico, aprobado por el Real Decreto 849/1986, de 11 de abril, Boletín Of. del Estado núm. 14, 16 enero 2008, páginas 3141 a 3149. Minist. la Pres., 9.
- BOE-A-2010-11184. 2010. Real Decreto 903/2010, de 9 de julio, de evaluación y gestión de riesgos de inundación, Boletín Of. del Estado. núm. 171, 15 julio 2010, páginas 61954 a 61967. Minist. la Pres., 14.
- BOE-A-2016-12466. 2016. Real Decreto 638/2016, de 9 de diciembre, por el que se modifica el Reglamento del Dominio Público Hidráulico aprobado por el Real Decreto 849/1986, de 11 de abril, el Reglamento de Planificación Hidrológica, aprobado por el Real Decreto 907/2007, y otros, Boletín Of. del Estado. núm. 314, 29 diciembre 2016, páginas 91133 a 91175. Minist. Agric. y Pesca, Aliment. y Medio Ambient., 43.
- Cea, L., Bladé, E. 2015. A simple and efficient unstructured finite volume scheme for solving the shallow water equations in overland flow applications, *Water Resour. Res.*, 51(7), 5464-5486. <https://doi.org/10.1002/2014WR016547>
- Cea, L., Bermúdez, M., Puertas, J., Bladé, E., Corestein, G., Escolano, E., Conde, A., Bockelmann-Evans, B., Ahmadian, R. 2016. IberWQ: new simulation tool for 2D water quality modelling in rivers and shallow estuaries, *J. Hydroinformatics*, 18(5), 816-830. <https://doi.org/10.2166/hydro.2016.235>
- Chaudhry, M.H. 2008. *Open-channel flow*, Second Edition. Springer Science+Business Media, LLC. <https://doi.org/10.1007/978-0-387-68648-6>
- DOUE-L-2007-82010. 2007. Directiva 2007/60/CE del Parlamento Europeo y del Consejo, de 23 de octubre de 2007, relativa a la evaluación y gestión de los riesgos de inundación.
- Federal Emergency Management Agency (FEMA). 2015. Department of Homeland Security. *Mitigation and Division: Multi-hazard Loss Estimation Methodology. Flood Model*. Hazus-HM MR5 Technical Manual, EEUU.
- Fonseca, A.R., Santos, M., Santos, J.A. 2018. Hydrological and flood hazard assessment using a coupled modelling approach for a mountainous catchment in Portugal, *Stoch. Environ. Res. Risk Assess.*, 1. <https://doi.org/10.1007/s00477-018-1525-1>
- González-Aguirre, J.C., Vázquez-Cendón, M.E., Alavez-Ramírez, J. 2016. Simulación numérica de inundaciones en Villahermosa México usando el código IBER, *Ing. del Agua*, 20(4), 201. <https://doi.org/10.4995/ia.2016.5231>
- ISDR. 2009. *Global assessment report on disaster risk reduction*, United Nations, Geneva, Switzerland.
- Kron, W. 2005. Flood Risk = Hazard + Values + Vulnerability, *Water Int.*, 30(1), 58-68. <https://doi.org/10.1080/02508060508691837>

- López, D., Ramos, T., Sánchez, P., Marivela, R., Díaz, R., Rebollo, J.J., Andrés, F.R., Cuellar, V., De Blas, M., García, J.L. 2018. Smoothed particle hydrodynamics method for three-dimensional open channel flow simulations, *J. Appl. Fluid Mech.*, 11(6), 1599-1611. <https://doi.org/10.29252/jafm.11.06.28608>
- MAGRAMA. 2011. *Guía Metodológica para el Desarrollo del Sistema Nacional de Cartografía de Zonas Inundables*, Ministerio de Medio Ambiente y Medio Rural y Marino. Gobierno de España: Madrid, España.
- MAPAMA. 2017. *Guía de apoyo a la aplicación del RDPH en las limitaciones a los usos del suelo en las zonas inundables de origen fluvial*, Ministerio de Agricultura y Pesca, Alimentación y Medio Ambiente.
- Martínez-Gomariz, E., Gómez, M., Russo, B. 2016a. Estabilidad de personas en flujos de agua, *Ing. del agua*, 20(1), 43-58. <https://doi.org/10.4995/ia.2016.4231>
- Martínez-Gomariz, E., Gómez, M., Russo, B. 2016b. Experimental study of the stability of pedestrians exposed to urban pluvial flooding, *Nat. Hazards*, 82(2), 1259-1278. <https://doi.org/10.1007/s11069-016-2242-z>
- MMA. 1996. *Clasificación de presas en Función del Riesgo Potencial - Guía Técnica*, Ministerio de Medio Ambiente. Dirección General de Obras Hidráulicas y Calidad de las Aguas.
- Ochoa García, S.A., Reyna, T., García, M., Herrero, H., Díaz, J.M., Heredia, A. 2017. Análisis de la implementación de un modelo hidrodinámico tridimensional al flujo de un cauce natural, *Ing. del Agua*, 21(2), 103-107. <https://doi.org/10.4995/ia.2017.6885>
- Ribó, R., De Riera, M., Escolano, E. 1999. *GiD Reference Manual*, Ed. CIMNE, Spain.
- Roux, H., Amengual, A., Romero, R., Bladé, E., Sanz-Ramos, M. 2019. Evaluation of two hydrometeorological ensemble strategies for flash flood forecasting over a catchment of the eastern Pyrenees, *Nat. Hazards Earth Syst. Sci. Discuss.*, 425-450. <https://doi.org/10.5194/nhess-2019-232>.
- Ruiz-Villanueva, V., Bodoque, J. M., Díez-Herrero, A., Bladé, E. 2014. Large wood transport as significant influence on flood risk in a mountain village, *Nat. Hazards*, 74(2), 967-987. <https://doi.org/10.1007/s11069-014-1222-4>
- Russo, B., Gómez, M., Macchione, F. 2013. Pedestrian hazard criteria for flooded urban areas, *Nat. Hazards*, 69(1), 251-265. <https://doi.org/10.1007/s11069-013-0702-2>
- Sanz-Ramos, M., Bladé, E., Niñerola, D., Palau-Ibars, A. 2018a. Evaluación numérico-experimental del comportamiento histórico del coeficiente de rugosidad de los macrófitos, *Ing. del Agua*, 22(3), 109-124. <https://doi.org/10.4995/ia.2018.8880>
- Sanz-Ramos, M., Amengual, A., Bladé, E., Romero, R., Roux, H. 2018b. Flood forecasting using a coupled hydrological and hydraulic model (based on FVM) and highresolution meteorological model, in *E3S Web of Conferences*, vol. 40.
- Sanz-Ramos, M., Bladé Castellet, E., Palau Ibars, A., Vericat Querol, D., Ramos-Fuertes, A. 2019a. IberHABITAT: evaluación de la Idoneidad del Hábitat Físico y del Hábitat Potencial Útil para peces. Aplicación en el río Eume, *Ribagua*, 6(2), 158-167. <https://doi.org/10.1080/23863781.2019.1664273>
- Sanz-Ramos, M., Olivares Cerpa, G., Bladé i Castellet, E. 2019b. Metodología para el análisis de rotura de presas con aterramiento mediante simulación con fondo móvil, *Ribagua*, 6(2), 138-147. <https://doi.org/10.1080/23863781.2019.1705198>
- Sopelana, J., Cea, L., Ruano, S. 2017. Determinación de la inundación en tramos de ríos afectados por marea basada en la simulación continua de nivel, *Ing. del Agua*, 21(4), 231-246. <https://doi.org/10.4995/ia.2017.8770>
- Toro, E. F. 2009. *Riemann Solvers and Numerical Methods for Fluid Dynamics*, Springer, Berlin (Heidelberg). <https://doi.org/10.1007/b79761>
- UNISDR. 2015. The human cost of weather related disasters (1995-2015).
